# Supplementary material
Source: Royal Society of Chemistry journal article supplement (doi:10.1039/d6ta00362a)
Supplement: d6ta00362a1.pdf [file d6ta00362a1.pdf]

***Electronic Supplementary Information (ESI)***

**Novel Silicoaluminophosphate Molecular Sieves with CHA/GME Intergrowth**

**Structures: Synthesis, Structural Elucidation and Catalytic Application**

Dehua Wang,<sup>a</sup> Beibei Gao,<sup>b</sup> Miao Yang,<sup>c</sup> Dong Fan,<sup>c</sup> Peng Tian<sup>c, \*</sup> and Zhongmin Liu<sup>c, \*</sup>

<sup>a</sup> School of Pharmaceutical and Chemical Engineering, Taizhou University, Taizhou 318000, China.

<sup>b</sup> Green Catalysis Center and College of Chemistry, Zhengzhou University, Zhengzhou 450001, China.

<sup>c</sup> National Engineering Research Center of Lower-Carbon Catalysis Technology, Dalian National Laboratory for Clean Energy, Dalian Institute of Chemical Physics, Chinese Academy of Sciences, Dalian 116023, P. R. China.

\*Corresponding authors, E-mail: [tianpeng@dicp.ac.cn](mailto:tianpeng@dicp.ac.cn), [liuzm@dicp.ac.cn](mailto:liuzm@dicp.ac.cn).

## Table of Contents

### 1. Supplementary Tables

**Table S1** Structural Characteristics of ABC-6 Family Zeolites.

### 2. Supplementary Figures

**Fig. S1** Simulated powder XRD patterns of the CHA/GME intergrowth zeolites. The stacking of the PerBU's in AABB- and AABBC-sequences is disordered.

**Fig. S2** TG and DTA curves of the as-synthesized (a) DNL-8 (sample 1) and (b) DNL-9 (sample 5) samples.

**Fig. S3** FTIR spectra of the as-synthesized samples DNL-8 (sample 1) and DNL-9 (sample 5).

**Fig. S4** (a) XRD patterns of the as-synthesized samples and (b) SEM image of sample 3.

**Fig. S5** (a) XRD patterns and SEM images of (b) sample 6, (c) sample 7 and (d) sample 8.

**Fig. S6**  $^{27}\text{Al}$  and  $^{31}\text{P}$  MAS NMR spectra of (a) sample 1 and (b) sample 3.

**Fig. S7** (a) The length of *d6r* and (b,c) GME framework along the *c* and *a* axes, respectively.

**Fig. S8** Methanol conversion and product selectivity in the methanol amination reaction on DNL-9 (sample 8) at 320 °C with a  $\text{NH}_3/\text{CH}_3\text{OH}$  molar ratio of 2/1 and methanol WHSV= 0.813  $\text{h}^{-1}$ .

**Fig. S9**  $\text{NH}_3$ -TPD profiles of DNL-9 (sample 8) and SAPO-34(B).

## 1. Supplementary Tables

**Table S1** Structural Characteristics of ABC-6 Family Zeolites

| Type materials | Code | Group Space | Sizes Ring  | Stacking (Repeated layer) sequence | Building units                                        |
|----------------|------|-------------|-------------|------------------------------------|-------------------------------------------------------|
| Cancrinite     | CAN  | $P6_3/mmc$  | 12 6<br>4   | AB(A)...(2)                        | Single 6-rings only<br>12.25Å-12.70Å                  |
| Sodalite       | SOD  | $Im-3m$     | 6 4         | ABC(A)...(3)                       |                                                       |
| Losod          | LOS  | $P6_3/mmc$  | 6 4         | ABAC(A)...(4)                      |                                                       |
| Liottite       | LIO  | $P-6m2$     | 6 4         | ABACAC(A)...(6)                    |                                                       |
| Afganite       | AFG  | $P6_3/mmc$  | 6 4         | ABABACAC(A)...(8)                  |                                                       |
| Franzinite     | FRA  | $P-3m1$     | 6 4         | ABCABACABC(A)...(11)               |                                                       |
| Toukrite       | TOL  | $P-3m1$     | 6 4         | CACACBCBCACB(C)...(12)             |                                                       |
| Marinellite    | MAR  | $P6_3/mmc$  | 6 4         | ABCBCBACBCBC(A)...(12)             |                                                       |
| Farneseite     | FAR  | $P6_3/mmc$  | 6 4         | ABCABABACBACAC(A)...(14)           |                                                       |
| Giuseppettite  | GIU  | $P6_3/mmc$  | 6 4         | ABABABACBACBAC(A)...(16)           |                                                       |
| Offretite      | OFF  | $P-6m2$     | 12 8<br>6 4 | AAB(A)...(3)                       | Double 6-rings<br>and single 6-rings<br>12.85Å-13.20Å |
| ZnAlPO-57      | AFV  | $P-3m1$     | 8 6 4       | AABCC(A)...(5)                     |                                                       |
| Erionite       | ERI  | $P6_3/mmc$  | 8 6 4       | AABAAC(A)...(6)                    |                                                       |
| TMA-E(AB)      | EAB  | $P6_3/mmc$  | 8 6 4       | AABCCB(A)...(6)                    |                                                       |
| ZnAlPO-59      | AVL  | $P-3m1$     | 8 6 4       | ABBACCA(A)...(7)                   |                                                       |
| Levyne         | LEV  | $R-3m$      | 8 6 4       | AABCCABBC(A)...(9)                 |                                                       |
| STA-2          | SAT  | $R-3m$      | 8 6 4       | AABABBCBCCAC(A)...(12)             |                                                       |
| Gmelinite      | GME  | $P6_3/mmc$  | 12 8<br>6 4 | AABB(A)...(4)                      | Double 6-rings<br>only 13.65Å-<br>13.75Å              |
| Chabazite      | CHA  | $R-3m$      | 8 6 4       | AABBCC(A)...(6)                    |                                                       |
| SAPO-56        | AFX  | $P6_3/mmc$  | 8 6 4       | AABBCCBB(A)...(8)                  |                                                       |
| AIPO-52        | AFT  | $P6_3/mmc$  | 8 6 4       | AABBCCBBAACC(A)...(12)             |                                                       |
| SSZ-52         | SFW  | $R-3m$      | 8 6 4       | AABBAABBCCBCCAACC(A)...(18)        |                                                       |

## 2. Supplementary Figures

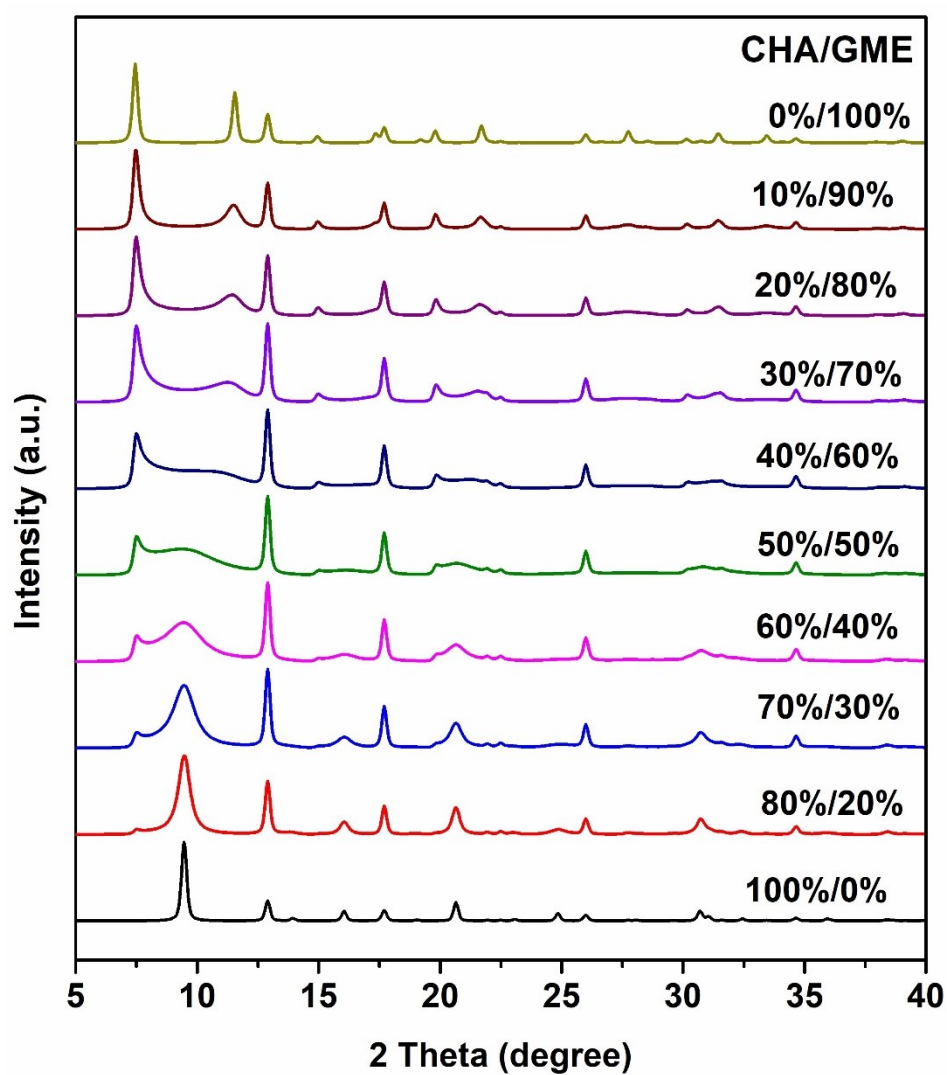

**Fig. S1** Simulated powder XRD patterns of the CHA/GME intergrowth zeolites. The stacking of the PerBU's in AAB- and AABCC-sequences is disordered.

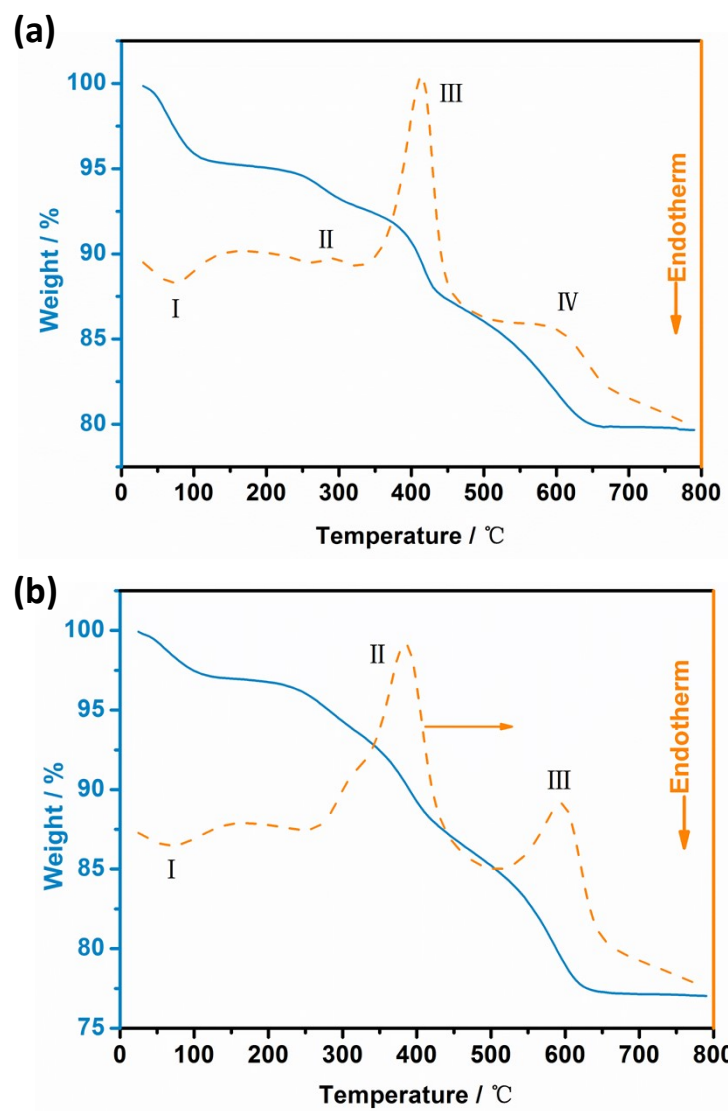

**Fig. S2** TG and DTA curves of the as-synthesized (a) DNL-8 (sample 1) and (b) DNL-9 (sample 5) samples.

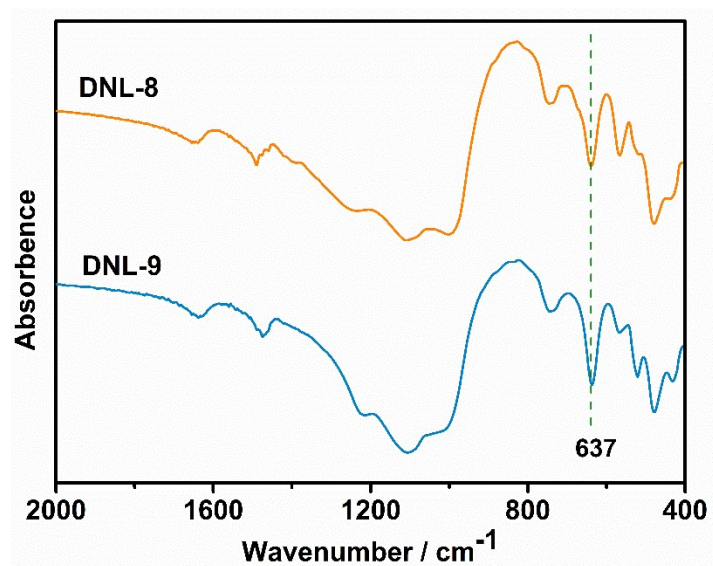

**Fig. S3** FTIR spectra of the as-synthesized samples DNL-8 (sample 1) and DNL-9 (sample 5).

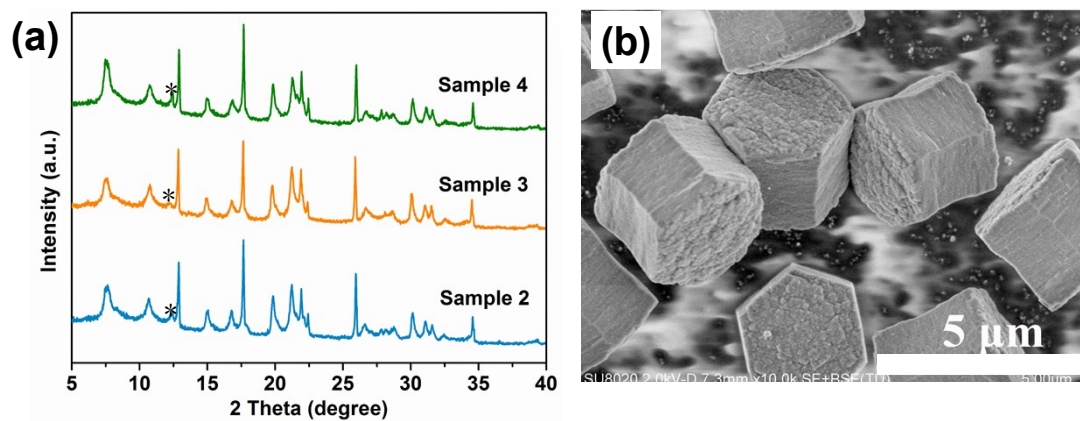

Fig. S4 (a) XRD patterns of the as-synthesized samples and (b) SEM image of sample 3.

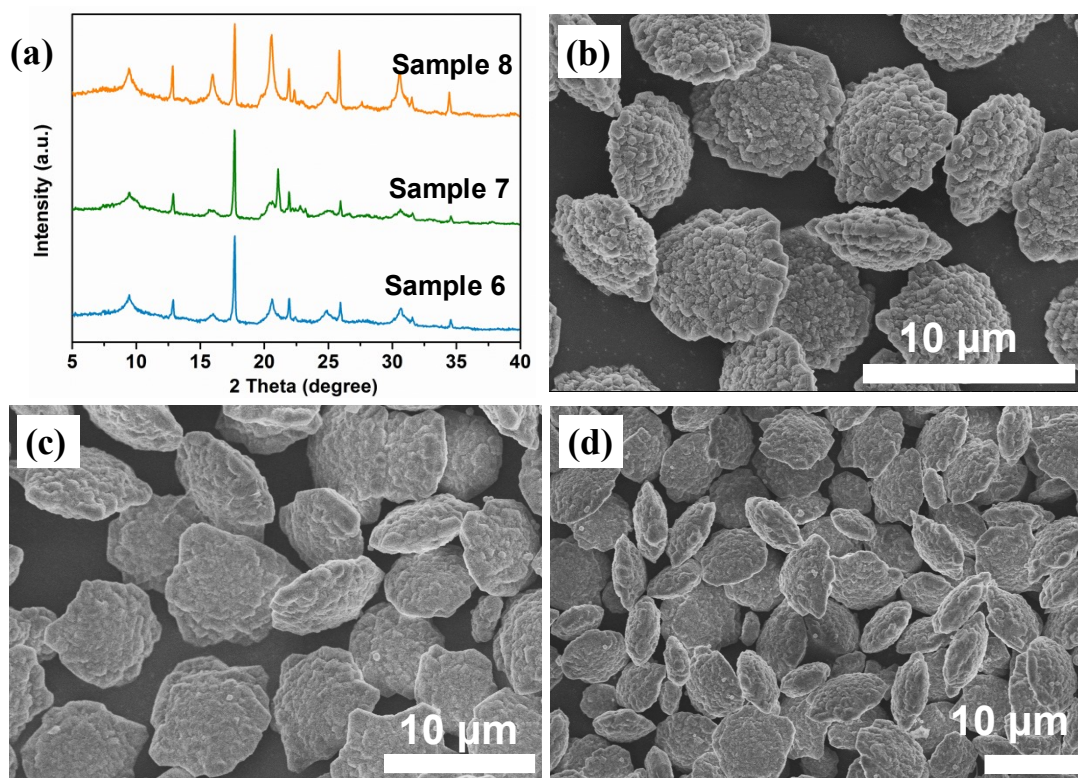

**Fig. S5** (a) XRD patterns and SEM images of (b) sample 6, (c) sample 7 and (d) sample 8.

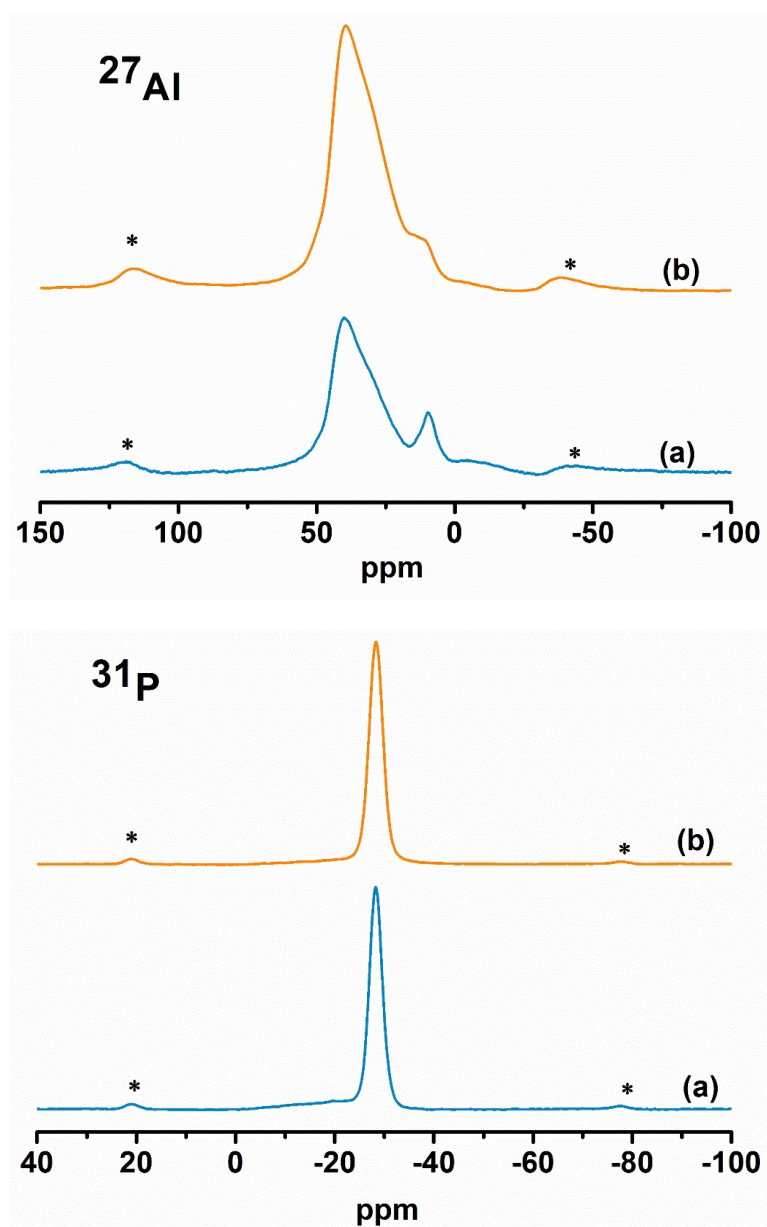

**Fig. S6**  $^{27}\text{Al}$  and  $^{31}\text{P}$  MAS NMR spectra of (a) sample 1 and (b) sample 3.

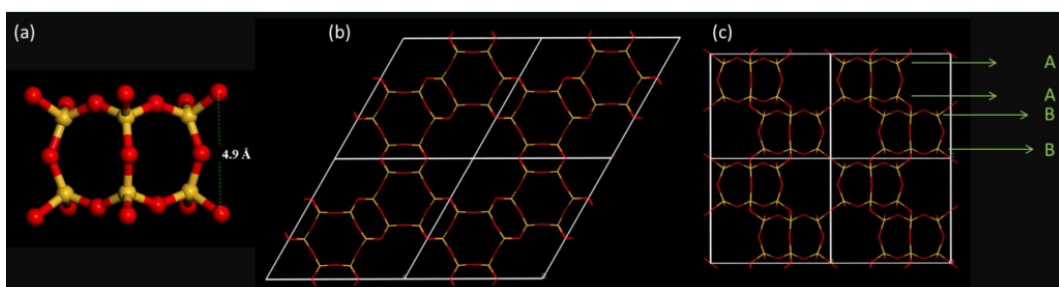

**Fig. S7** (a) The length of *d6r* and (b,c) GME framework along the *c* and *a* axes, respectively.

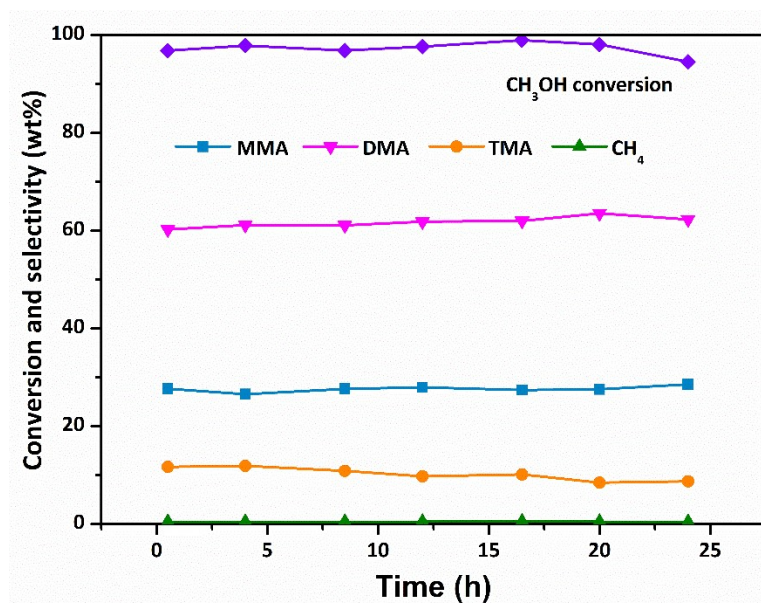

**Fig. S8** Methanol conversion and product selectivity in the methanol amination reaction on DNL-9 (sample 8) at 320 °C with a NH<sub>3</sub>/CH<sub>3</sub>OH molar ratio of 2/1 and methanol WHSV= 0.813 h<sup>-1</sup>.

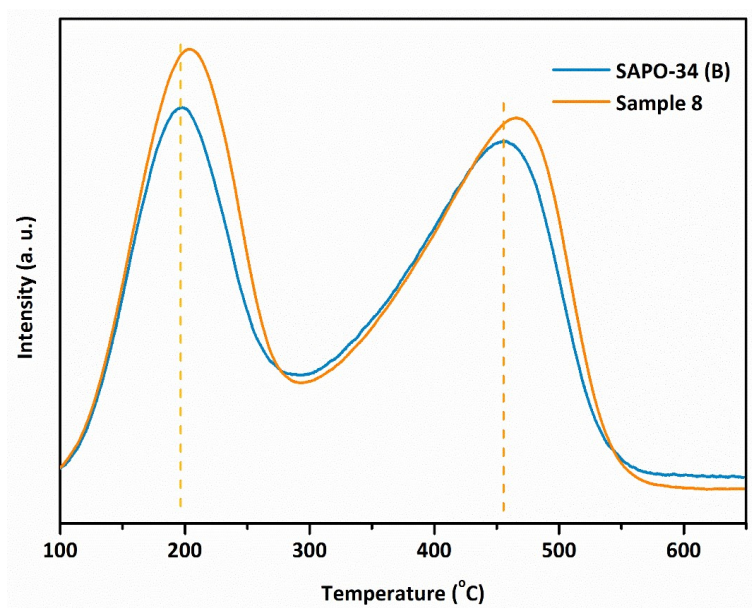

**Fig. S9** NH<sub>3</sub>-TPD profiles of DNL-9 (sample 8) and SAPO-34(B).

**Note:** Elemental compositions of DNL-9 (sample 8) and SAPO-34(B): Al<sub>0.463</sub>P<sub>0.330</sub>Si<sub>0.207</sub> and Si<sub>0.216</sub>Al<sub>0.461</sub>P<sub>0.323</sub>, respectively. The gel molar composition for the synthesis of SAPO-34(B) is 0.9SiO<sub>2</sub> : 0.8P<sub>2</sub>O<sub>5</sub> : 1Al<sub>2</sub>O<sub>3</sub> : 50H<sub>2</sub>O : 2diethylamine (DEA), and the crystallization was carried out at 200 °C for 24 h.
